# Supplementary material for: Wide Diversity of Coronaviruses in Frugivorous and Insectivorous Bat Species: A Pilot Study in Guinea, West Africa
Source: PubMed Central journal article supplement (PMC7472279; doi:10.3390/v12080855), 2020-08-05
Supplement: viruses-12-00855-s001.pdf [file viruses-12-00855-s001.pdf]

# Supplementary Materials: Wide Diversity of Coronaviruses in Frugivorous and Insectivorous Bat Species: A Pilot Study in Guinea, West Africa

**Table S1.** Details on coronavirus reference sequences used in phylogenetic tree analysis.

| Strain               | Country      | Year | Host                              | Accession | Virus type |
|----------------------|--------------|------|-----------------------------------|-----------|------------|
| BtKY24               | Kenya        | 2006 | <i>Eidolon helvum</i>             | HQ728482  | Beta-CoV   |
| CMR900               | Cameroon     | 2013 | <i>Eidolon helvum</i>             | MG693169  | Beta-CoV   |
| BtKY95               | Kenya        | 2007 | <i>Eidolon helvum</i>             | GU065439  | Beta-CoV   |
| BtKY92               | Kenya        | 2007 | <i>Eidolon helvum</i>             | GU065436  | Beta-CoV   |
| 18930                | Madagascar   | 2014 | <i>Rousettus madagascariensis</i> | MN183192  | Beta-CoV   |
| BtKY89               | Kenya        | 2007 | <i>Eidolon helvum</i>             | GU065433  | Beta-CoV   |
| 130403Eh04 (PREDICT) | Kenya        | 2013 | <i>Eidolon helvum</i>             | KX285108  | Beta-CoV   |
| BtKY44               | Kenya        | 2007 | <i>Eidolon helvum</i>             | GU065388  | Beta-CoV   |
| 8466-11              | Madagascar   | 2011 | <i>Eidolon dupreanum</i>          | KF859764  | Beta-CoV   |
| CMR891               | Cameroon     | 2013 | <i>Eidolon helvum</i>             | MG693171  | Beta-CoV   |
| CMR704               | Cameroon     | 2013 | <i>Eidolon helvum</i>             | MG693168  | Beta-CoV   |
| CMR705               | Cameroon     | 2013 | <i>Eidolon helvum</i>             | MG693172  | Beta-CoV   |
| KSA282               | Saudi Arabia | 2012 | <i>Eidolon helvum</i>             | MH396479  | Beta-CoV   |
| ECO70332 (PREDICT)   | Cameroon     | 2013 | <i>Micropterus pusillus</i>       | KX284986  | Beta-CoV   |
| ECO70527 (PREDICT)   | Cameroon     | 2013 | <i>Epomophorus gambianus</i>      | KX285008  | Beta-CoV   |
| ECO70509 (PREDICT)   | Cameroon     | 2013 | <i>Epomophorus gambianus</i>      | KX284993  | Beta-CoV   |
| CD115912 (PREDICT)   | DRC          | 2014 | <i>Micropterus pusillus</i>       | KX285075  | Beta-CoV   |
| CD116103 (PREDICT)   | DRC          | 2014 | <i>Epomops franqueti</i>          | KX285102  | Beta-CoV   |
| RC1159 (PREDICT)     | Congo        | 2014 | <i>Eidolon helvum</i>             | KX285513  | Beta-CoV   |
| BtKY56               | Kenya        | 2007 | <i>Epomophorus labiatus</i>       | GU065400  | Beta-CoV   |
| AATHA (PREDICT)      | Tanzania     | 2013 | <i>Epomophorus</i> sp.            | KX285299  | Beta-CoV   |
| 140403Bt16 (PREDICT) | Rwanda       | 2014 | <i>Epomophorus labiatus</i>       | KX285431  | Beta-CoV   |
| 130518Bt35 (PREDICT) | Rwanda       | 2013 | <i>Rousettus aegyptiacus</i>      | KX285428  | Beta-CoV   |
| 130512Bt05 (PREDICT) | Rwanda       | 2013 | <i>Myonycteris angolensis</i>     | KX285426  | Beta-CoV   |
| CMR66                | Cameroon     | 2013 | <i>Eidolon helvum</i>             | MG693170  | Beta-CoV   |
| BtKY27               | Kenya        | 2006 | <i>Rousettus aegyptiacus</i>      | HQ728484  | Alpha-CoV  |
| BtKY78               | Kenya        | 2007 | <i>Rousettus aegyptiacus</i>      | GU065422  | Beta-CoV   |
| HKU9-10-1            | China        | 2006 | <i>Rousettus</i> sp.              | HM211100  | Beta-CoV   |
| HKU9-3               | China        | NA   | NA                                | EF065515  | Beta-CoV   |

|             |              |      |                                  |           |          |
|-------------|--------------|------|----------------------------------|-----------|----------|
| GCCDC1_356  | China        | 2014 | <i>Rousettus leschenaulti</i>    | NC_030886 | Beta-CoV |
| ANK011F     | Madagascar   | 2010 | <i>Pteropus rufus</i>            | KF859760  | Beta-CoV |
| 8563-11     | Madagascar   | 2011 | <i>Pteropus rufus</i>            | KP696744  | Beta-CoV |
| BJ232       | China        | 2014 | canine                           | KX432213  | Beta-CoV |
| HY24        | China        | 2017 | yak                              | MH810163  | Beta-CoV |
| PHE         | China        | 2008 | porcine                          | KY994645  | Beta-CoV |
| OC43        | China        | 2010 | human                            | KP198611  | Beta-CoV |
| OC43LRTI238 | Mexico       | 2011 | human                            | KX344031  | Beta-CoV |
| HKU14-3     | Hong Kong    | 2007 | rabbit                           | JN874560  | Beta-CoV |
| HKU1-12     | USA          | 2010 | human                            | KF686346  | Beta-CoV |
| HKU1        | Hong Kong    | NA   | human                            | AY597011  | Beta-CoV |
| CCK-NC7     | South Africa | 2015 | <i>Neoromicia capensis</i>       | MG817490  | Beta-CoV |
| CDK-NC1     | South Africa | 2015 | <i>Neoromicia capensis</i>       | MG205591  | Beta-CoV |
| SRP-NC3     | South Africa | 2014 | <i>Neoromicia capensis</i>       | MG817484  | Beta-CoV |
| CGR-NC3     | South Africa | 2015 | <i>Neoromicia capensis</i>       | MG817486  | Beta-CoV |
| HKU697      | Burkina Faso | 2015 | camel                            | MG923473  | Beta-CoV |
| Al-Hasa     | Saudi Arabia | 2013 | human                            | KF600644  | Beta-CoV |
| 5038        | South Africa | 2015 | <i>Neoromicia capensis</i>       | MF593268  | Beta-CoV |
| PML-PHE     | South Africa | 2011 | <i>Neoromicia capensis</i>       | KC869678  | Beta-CoV |
| PDF-2180    | Uganda       | 2013 | <i>Pipistrellus hesperidus</i>   | NC_034440 | Beta-CoV |
| 18974       | Mozambique   | 2015 | <i>Nycteris thebaica</i>         | MN183195  | Beta-CoV |
| KW2E-F82    | Ghana        | 2011 | <i>Nycteris</i> sp.              | JX899382  | Beta-CoV |
| It2         | Italy        | 2009 | <i>Rhinolophus ferrumequinum</i> | KC633200  | Beta-CoV |
| FR0711-B3   | France       | 2011 | <i>Rhinolophus ferrumequinum</i> | KC633207  | Beta-CoV |
| BB99-04     | Belgium      | 2009 | <i>Rhinolophus euryale</i>       | KC633202  | Beta-CoV |
| BtKY72      | Kenya        | 2007 | <i>Rhinolophus</i> sp.           | KY352407  | Beta-CoV |
| 441         | Rwanda       | 2008 | <i>Rhinolophus clivosus</i>      | JQ649535  | Beta-CoV |
| Wuhan-Hu-1  | China        | 2019 | human                            | NC_045512 | Beta-CoV |
| 761203      | France       | 2020 | human                            |           | Beta-CoV |
| RaTG13      | China        | 2013 | <i>Rhinolophus affinis</i>       | MN996532  | Beta-CoV |
| GX-P4L      | China        | 2017 | pangolin                         | MT040333  | Beta-CoV |
| Tor2        | Canada       | NA   | human                            | AY274119  | Beta-CoV |
| SZ3         | Hong Kong    | 2003 | civet                            | AY304486  | Beta-CoV |
| RsSHC014    | China        | 2011 | <i>Rhinolophus sinicus</i>       | KC881005  | Beta-CoV |
| As6526      | China        | 2014 | <i>Aselliscus stoliczkanus</i>   | KY417142  | Beta-CoV |
| Rs4874      | China        | 2013 | <i>Rhinolophus sinicus</i>       | KY417150  | Beta-CoV |
| HKU3-1      | China        | NA   | <i>Rhinolophus</i> sp.           | DQ022305  | Beta-CoV |

|                           |              |      |                              |          |           |
|---------------------------|--------------|------|------------------------------|----------|-----------|
| <b>Rp-Shaanxi2011</b>     | China        | 2011 | <i>Rhinolophus pusillus</i>  | JX993987 | Beta-CoV  |
| <b>ECO70036 (PREDICT)</b> | Cameroon     | 2013 | <i>Hipposideros caffer</i>   | KX284981 | Beta-CoV  |
| <b>13BG0214</b>           | Gabon        | 2013 | <i>Hipposideros gigas</i>    | MG963186 | Beta-CoV  |
| <b>13GB215</b>            | Gabon        | 2013 | <i>Hipposideros gigas</i>    | MG963187 | Beta-CoV  |
| <b>13GB0273</b>           | Gabon        | 2013 | <i>Hipposideros gigas</i>    | MG963188 | Beta-CoV  |
| <b>292</b>                | Gabon        | 2009 | <i>Hipposideros caffer</i>   | JX174638 | Beta-CoV  |
| <b>CS105</b>              | Gabon        | 2009 | <i>Hipposideros ruber</i>    | MG963190 | Alpha-CoV |
| <b>390</b>                | Gabon        | 2009 | <i>Hipposideros caffer</i>   | JX174639 | Alpha-CoV |
| <b>09GB0376</b>           | Gabon        | 2009 | <i>Hipposideros ruber</i>    | MG963196 | Alpha-CoV |
| <b>09GB0379</b>           | Gabon        | 2009 | <i>Hipposideros ruber</i>    | MG963197 | Alpha-CoV |
| <b>10GB0318</b>           | Gabon        | 2010 | <i>Hipposideros ruber</i>    | MG963201 | Alpha-CoV |
| <b>10GB0354</b>           | Gabon        | 2010 | <i>Hipposideros gigas</i>    | MG963200 | Alpha-CoV |
| <b>Kwam31</b>             | Ghana        | 2008 | <i>Hipposideros</i> sp.      | FJ710049 | Beta-CoV  |
| <b>19020</b>              | Mozambique   | 2015 | <i>Rhinolophus rhodesiae</i> | MN183146 | Alpha-CoV |
| <b>19030</b>              | Mozambique   | 2015 | <i>Rhinolophus rhodesiae</i> | MN183151 | Alpha-CoV |
| <b>18991</b>              | Mozambique   | 2015 | <i>Rhinolophus lobatus</i>   | MN183155 | Alpha-CoV |
| <b>BtKY83</b>             | Kenya        | 2007 | <i>Rhinolophus</i> sp.       | GU065427 | Alpha-CoV |
| <b>19217</b>              | Mozambique   | 2015 | <i>Mops condylurus</i>       | MN183182 | Alpha-CoV |
| <b>AATBM (PREDICT)</b>    | Tanzania     | 2013 | <i>Tadarida</i> sp.          | KX285348 | Alpha-CoV |
| <b>19207</b>              | Mozambique   | 2015 | <i>Mops condylurus</i>       | MN183181 | Alpha-CoV |
| <b>DC84</b>               | South Africa | 2016 | <i>Rhinolophus simulator</i> | MG310234 | Alpha-CoV |
| <b>AAOSV (PREDICT)</b>    | Tanzania     | 2012 | <i>Chaerephon pumilus</i>    | KX285262 | Alpha-CoV |
| <b>ECO05817 (PREDICT)</b> | Cameroon     | 2010 | <i>Micropterus pusillus</i>  | KX284952 | Alpha-CoV |
| <b>ECO70102 (PREDICT)</b> | Cameroon     | 2013 | <i>Mops condylurus</i>       | KX284982 | Alpha-CoV |
| <b>ECO70538 (PREDICT)</b> | Cameroon     | 2013 | <i>Mops condylurus</i>       | KX285014 | Alpha-CoV |
| <b>AATCA (PREDICT)</b>    | Tanzania     | 2013 | <i>Tadarida</i> sp.          | KX285352 | Alpha-CoV |
| <b>18238</b>              | Madagascar   | 2013 | <i>Mormopterus jugularis</i> | MN183185 | Alpha-CoV |
| <b>369</b>                | Reunion      | 2015 | <i>Mormopterus</i> sp.       | MN183188 | Alpha-CoV |
| <b>004</b>                | Mayotte      | 2014 | <i>Chaerephon pusillus</i>   | MN183177 | Alpha-CoV |
| <b>HK140714</b>           | China        | 2018 | <i>Scotophilus kuhlii</i>    | MN611521 | Alpha-CoV |
| <b>GX2018A</b>            | China        | 2017 | <i>Scotophilus kuhlii</i>    | MK211369 | Alpha-CoV |
| <b>D5.73</b>              | Germany      | 2007 | <i>Pipistrellus</i>          | EU375869 | Alpha-CoV |
| <b>HKU6-1</b>             | China        | NA   | <i>Myotis</i> sp.            | DQ249224 | Alpha-CoV |
| <b>SAX2011</b>            | China        | 2011 | <i>Myotis riketti</i>        | KJ473806 | Alpha-CoV |
| <b>LUX15</b>              | Luxembourg   | 2015 | <i>Myotis emarginatus</i>    | KY502383 | Alpha-CoV |
| <b>Kwam27</b>             | Ghana        | 2008 | <i>Hipposideros</i> sp.      | FJ710050 | Beta-CoV  |
| <b>Kwam20</b>             | Ghana        | 2008 | <i>Hipposideros</i> sp.      | FJ710047 | Beta-CoV  |
| <b>Boo348</b>             | Ghana        | 2008 | <i>Hipposideros</i> sp.      | FJ710043 | Beta-CoV  |
| <b>Kwam19</b>             | Ghana        | 2008 | <i>Hipposideros</i> sp.      | FJ710046 | Alpha-CoV |
| <b>Boo344</b>             | Ghana        | 2008 | <i>Hipposideros</i> sp.      | FJ710044 | Alpha-CoV |
| <b>KW1C-F161</b>          | Ghana        | 2010 | <i>Hipposideros ruber</i>    | KT253264 | Alpha-CoV |

|                       |             |      |                                |           |           |
|-----------------------|-------------|------|--------------------------------|-----------|-----------|
| <b>BtKY229E-8</b>     | Kenya       | 2010 | <i>Hipposideros vittatus</i>   | KY073748  | Alpha-CoV |
| <b>229E</b>           | NA          | NA   | human                          | AF304460  | Alpha-CoV |
| <b>18987</b>          | Mozambique  | 2015 | <i>Hipposideros caffer</i>     | MN183172  | Alpha-CoV |
| <b>Zaria</b>          | Nigeria     | 2008 | <i>Hipposideros commersoni</i> | HQ166910  | Beta-CoV  |
| <b>Zim035Mag</b>      | Zimbabwe    | 2016 | <i>Hipposideros</i> sp.        | MG000872  | Beta-CoV  |
| <b>Zim019Mab</b>      | Zimbabwe    | 2016 | <i>Hipposideros</i> sp.        | MG000867  | Alpha-CoV |
| <b>Zim021Mab</b>      | Zimbabwe    | 2016 | <i>Hipposideros</i> sp.        | MG000866  | Alpha-CoV |
| <b>Zim001Mab</b>      | Zimbabwe    | 2016 | <i>Hipposideros</i> sp.        | MG000865  | Alpha-CoV |
| <b>Zim037Mab</b>      | Zimbabwe    | 2016 | <i>Hipposideros</i> sp.        | MG000869  | Alpha-CoV |
| <b>Zim034Mab</b>      | Zimbabwe    | 2016 | <i>Hipposideros</i> sp.        | MG000871  | Alpha-CoV |
| <b>Zim015Mab</b>      | Zimbabwe    | 2016 | <i>Hipposideros</i> sp.        | MG000866  | Alpha-CoV |
| <b>Zim040Mab</b>      | Zimbabwe    | 2016 | <i>Hipposideros</i> sp.        | MG000870  | Alpha-CoV |
| <b>19174</b>          | Mozambique  | 2015 | <i>Triaenops afer</i>          | MN183165  | Alpha-CoV |
| <b>BtKYNL63-15</b>    | Kenya       | 2008 | <i>Triaenops afer</i>          | KY073746  | Alpha-CoV |
| <b>GD03</b>           | China       | 2018 | human                          | MK334044  | Alpha-CoV |
| <b>NL63</b>           | Kenya       | 2014 | human                          | KP112154  | Alpha-CoV |
| <b>BtNv-SC2013</b>    | China       | 2013 | <i>Nyctalus velutinus</i>      | KJ473809  | Alpha-CoV |
| <b>GZ151867</b>       | China       | 2015 | <i>Tylonycteris robustala</i>  | MK720944  | Alpha-CoV |
| <b>19013</b>          | Mozambique  | 2015 | <i>Miniopterus mossambicus</i> | MN183157  | Alpha-CoV |
| <b>19024</b>          | Mozambique  | 2015 | <i>Rhinolophus rhodesiae</i>   | MN183159  | Alpha-CoV |
| <b>BtKY06</b>         | Kenya       | 2006 | <i>Rousettus aegyptiacus</i>   | HQ728483  | Alpha-CoV |
| <b>HKU7-1</b>         | China       | NA   | <i>Miniopterus magnater</i>    | DQ249226  | Alpha-CoV |
| <b>CoV100</b>         | Australia   | 2007 | <i>Rhinolophus megaphyllus</i> | EU834953  | Alpha-CoV |
| <b>HKU8-1</b>         | China       | NA   | <i>Micropterus pusillus</i>    | DQ249228  | Alpha-CoV |
| <b>GD2012</b>         | China       | 2012 | <i>Micropterus fuliginosus</i> | KJ473797  | Alpha-CoV |
| <b>19038</b>          | Mozambique  | 2015 | <i>Rhinolophus rhodesiae</i>   | MN183190  | Alpha-CoV |
| <b>19029</b>          | Mozambique  | 2015 | <i>Rhinolophus lobatus</i>     | MN183189  | Alpha-CoV |
| <b>BCoV-ENT</b>       | US          | 2001 | bovine                         | AF391541  | Beta-CoV  |
| <b>MHV</b>            | US          | 2003 | <i>Mus musculus</i>            | FJ647226  | Beta-CoV  |
| <b>PHEV</b>           | Belgium     | 2005 | porcine                        | DQ011855  | Beta-CoV  |
| <b>PEDV-CV777</b>     | NA          | 1993 | porcine                        | AF353511  | Alpha-CoV |
| <b>UU10</b>           | Netherlands | 2007 | feline                         | FJ938059  | Alpha-CoV |
| <b>TGEV-AHHF</b>      | China       | 2015 | porcine                        | KX499468  | Alpha-CoV |
| <b>PRCV</b>           | US          | 2006 | porcine                        | DQ811787  | Alpha-CoV |
| <b>rodentCoV-JC34</b> | China       | 2011 | <i>Apodemus chevrieri</i>      | NC_034972 | Alpha-CoV |
| <b>FIPV</b>           | US          | 2011 | feline                         | KC461237  | Alpha-CoV |
| <b>RatCoV</b>         | China       | 2013 | rodent                         | KF294380  | Alpha-CoV |

NA: Non Applicable (missing data).
